# Supplementary figures and images for: Optimization of Bleaching Crude Palm Oil with Activated Snail Shell using Central Composite Design [CCD]
Source: Preprints.org preprint supplement (doi:10.20944/preprints202205.0190.v1), 2022-05-13

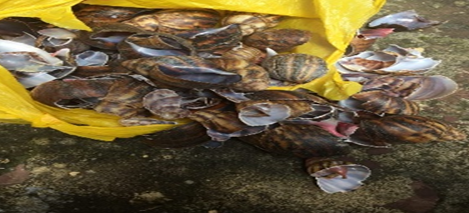

Supplement: Supplementary file 1 [file supplementary]
